# Supplementary material for: The Dysregulated Galectin Network Activates NF-κB to Induce Disease Markers and Matrix Degeneration in 3D Pellet Cultures of Osteoarthritic Chondrocytes
Source: Springer Nature journal article supplement (doi:10.1007/s00223-020-00774-4), 2020-11-13
Supplement: MOESM2 [file 18584904]

| Supplemental file 2. RT-qPCR checklist providing relevant information on the used protocols. |                                                                                                                                                                                                                                                                                                                                                                                                                                                                                                  |
|----------------------------------------------------------------------------------------------|--------------------------------------------------------------------------------------------------------------------------------------------------------------------------------------------------------------------------------------------------------------------------------------------------------------------------------------------------------------------------------------------------------------------------------------------------------------------------------------------------|
| Sample/Template                                                                              | details                                                                                                                                                                                                                                                                                                                                                                                                                                                                                          |
| Source                                                                                       | Cultured human osteoarthritic chondrocytes, isolated enzymatically from clinical specimens of patients undergoing total knee replacement surgery.                                                                                                                                                                                                                                                                                                                                                |
| Method of preservation                                                                       | No preservation; Total RNA was extracted directly from PBS washed micromass pellets or cell monolayers.                                                                                                                                                                                                                                                                                                                                                                                          |
| Storage time (if appropriate)                                                                | RNA was stored at -80°C and reverse transcribed into cDNA within one month. cDNA was stored at -80°C and analyzed within 1 year.                                                                                                                                                                                                                                                                                                                                                                 |
| Handling                                                                                     | ----                                                                                                                                                                                                                                                                                                                                                                                                                                                                                             |
| Extraction method                                                                            | Column based extraction method (innuPREP RNA Mini Kit (Analytik Jena, Germany)).                                                                                                                                                                                                                                                                                                                                                                                                                 |
| RNA: DNA-free                                                                                | All primer pairs used are intron-spanning primers. Each RNA sample was examined for purity and quantity using the NanoDrop 1000. 'Minus RT controls' were prepared from random RNA samples.                                                                                                                                                                                                                                                                                                      |
| Concentration                                                                                | Each RNA sample was examined for purity and quantity using the NanoDrop 1000.                                                                                                                                                                                                                                                                                                                                                                                                                    |
| RNA: integrity                                                                               | The process used for RNA isolation is periodically verified by checking the RNA integrity of samples using microfluidics (Bioanalyzer).                                                                                                                                                                                                                                                                                                                                                          |
| Inhibition-free                                                                              | Not all samples were tested for the absence of inhibitors. However, a representative set of samples was used to control for the absence of inhibitors using dilution series of target genes.                                                                                                                                                                                                                                                                                                     |
| Assay optimisation/validation                                                                |                                                                                                                                                                                                                                                                                                                                                                                                                                                                                                  |
| Accession numbers                                                                            |                                                                                                                                                                                                                                                                                                                                                                                                                                                                                                  |
| <i>IL1B</i>                                                                                  | NM_000576                                                                                                                                                                                                                                                                                                                                                                                                                                                                                        |
| <i>COL2A1</i>                                                                                | NM_001844                                                                                                                                                                                                                                                                                                                                                                                                                                                                                        |
| <i>COL1A1</i>                                                                                | NM_000088                                                                                                                                                                                                                                                                                                                                                                                                                                                                                        |
| <i>ACAN</i>                                                                                  | NM_001135                                                                                                                                                                                                                                                                                                                                                                                                                                                                                        |
| <i>SOX9</i>                                                                                  | NM_000346                                                                                                                                                                                                                                                                                                                                                                                                                                                                                        |
| <i>TIMP1</i>                                                                                 | NM_003254                                                                                                                                                                                                                                                                                                                                                                                                                                                                                        |
| <i>TIMP2</i>                                                                                 | NM_003255                                                                                                                                                                                                                                                                                                                                                                                                                                                                                        |
| <i>TIMP3</i>                                                                                 | NM_000362                                                                                                                                                                                                                                                                                                                                                                                                                                                                                        |
| <i>SDHA</i>                                                                                  | NM_004168                                                                                                                                                                                                                                                                                                                                                                                                                                                                                        |
| <i>MMP1</i>                                                                                  | NM_002421                                                                                                                                                                                                                                                                                                                                                                                                                                                                                        |
| <i>MMP3</i>                                                                                  | NM_002422                                                                                                                                                                                                                                                                                                                                                                                                                                                                                        |
| <i>MMP13</i>                                                                                 | NM_002427                                                                                                                                                                                                                                                                                                                                                                                                                                                                                        |
| <i>LGALS1</i>                                                                                | NM_002305                                                                                                                                                                                                                                                                                                                                                                                                                                                                                        |
| <i>LGALS3</i>                                                                                | NM_002306                                                                                                                                                                                                                                                                                                                                                                                                                                                                                        |
| <i>LGALS8</i>                                                                                | NM_006499                                                                                                                                                                                                                                                                                                                                                                                                                                                                                        |
|                                                                                              |                                                                                                                                                                                                                                                                                                                                                                                                                                                                                                  |
| Amplicon details                                                                             |                                                                                                                                                                                                                                                                                                                                                                                                                                                                                                  |
| <i>IL1B</i>                                                                                  | 132 bp                                                                                                                                                                                                                                                                                                                                                                                                                                                                                           |
| <i>COL2A1</i>                                                                                | 377 bp                                                                                                                                                                                                                                                                                                                                                                                                                                                                                           |
| <i>COL1A1</i>                                                                                | 179 bp                                                                                                                                                                                                                                                                                                                                                                                                                                                                                           |
| <i>ACAN</i>                                                                                  | 194 bp                                                                                                                                                                                                                                                                                                                                                                                                                                                                                           |
| <i>SOX9</i>                                                                                  | 180 bp                                                                                                                                                                                                                                                                                                                                                                                                                                                                                           |
| <i>TIMP1</i>                                                                                 | 195 bp                                                                                                                                                                                                                                                                                                                                                                                                                                                                                           |
| <i>TIMP2</i>                                                                                 | 153bp                                                                                                                                                                                                                                                                                                                                                                                                                                                                                            |
| <i>TIMP3</i>                                                                                 | 164 bp                                                                                                                                                                                                                                                                                                                                                                                                                                                                                           |
| <i>SDHA</i>                                                                                  | 86 bp                                                                                                                                                                                                                                                                                                                                                                                                                                                                                            |
| <i>MMP1</i>                                                                                  | 144 bp                                                                                                                                                                                                                                                                                                                                                                                                                                                                                           |
| <i>MMP3</i>                                                                                  | 184 bp                                                                                                                                                                                                                                                                                                                                                                                                                                                                                           |
| <i>MMP13</i>                                                                                 | 77 bp                                                                                                                                                                                                                                                                                                                                                                                                                                                                                            |
| <i>LGALS1</i>                                                                                | 125 bp                                                                                                                                                                                                                                                                                                                                                                                                                                                                                           |
| <i>LGALS3</i>                                                                                | 165 bp                                                                                                                                                                                                                                                                                                                                                                                                                                                                                           |
| <i>LGALS8</i>                                                                                | 91 bp                                                                                                                                                                                                                                                                                                                                                                                                                                                                                            |
|                                                                                              |                                                                                                                                                                                                                                                                                                                                                                                                                                                                                                  |
| Primer sequence                                                                              |                                                                                                                                                                                                                                                                                                                                                                                                                                                                                                  |
|                                                                                              | <b>forward</b>                                                                                                                                                                                                                                                                                                                                                                                                                                                                                   |
| <i>IL1B</i>                                                                                  | CTTATTACAGTGGCAATGAGGATG                                                                                                                                                                                                                                                                                                                                                                                                                                                                         |
| <i>COL2A1</i>                                                                                | TGGTGGAGCAGCAAG                                                                                                                                                                                                                                                                                                                                                                                                                                                                                  |
| <i>COL1A1</i>                                                                                | CACTGGTGATGCTGGTCTG                                                                                                                                                                                                                                                                                                                                                                                                                                                                              |
| <i>ACAN</i>                                                                                  | ACTGGCGAGCACTGTAAC                                                                                                                                                                                                                                                                                                                                                                                                                                                                               |
| <i>SOX9</i>                                                                                  | CAGTACCCGCACTTGACACA                                                                                                                                                                                                                                                                                                                                                                                                                                                                             |
| <i>TIMP1</i>                                                                                 | AATCCGACCTCGTCATCAG                                                                                                                                                                                                                                                                                                                                                                                                                                                                              |
| <i>TIMP2</i>                                                                                 | GTAGTGATCAGGGCCAAAGC                                                                                                                                                                                                                                                                                                                                                                                                                                                                             |
| <i>TIMP3</i>                                                                                 | GTACCGAGGCTTCACCAAGA                                                                                                                                                                                                                                                                                                                                                                                                                                                                             |
| <i>SDHA</i>                                                                                  | TGGGAACAAGAGGGCATCTG                                                                                                                                                                                                                                                                                                                                                                                                                                                                             |
| <i>MMP1</i>                                                                                  | CTGGAATTGGCCACAAGTT                                                                                                                                                                                                                                                                                                                                                                                                                                                                              |
| <i>MMP3</i>                                                                                  | GGTGTGGAGTTCTGTATGTTG                                                                                                                                                                                                                                                                                                                                                                                                                                                                            |
| <i>MMP13</i>                                                                                 | GTGGTGATGAAGATGATT                                                                                                                                                                                                                                                                                                                                                                                                                                                                               |
| <i>LGALS1</i>                                                                                | ATGGCTTGTGGTCTGGTC                                                                                                                                                                                                                                                                                                                                                                                                                                                                               |
| <i>LGALS3</i>                                                                                | GTGCCTATAACTGCCTTTG                                                                                                                                                                                                                                                                                                                                                                                                                                                                              |
| <i>LGALS8</i>                                                                                | AACCTGACGGCACTTAGC                                                                                                                                                                                                                                                                                                                                                                                                                                                                               |
|                                                                                              |                                                                                                                                                                                                                                                                                                                                                                                                                                                                                                  |
|                                                                                              | <b>reverse</b>                                                                                                                                                                                                                                                                                                                                                                                                                                                                                   |
| <i>IL1B</i>                                                                                  | AGTGGTGGTCGGAGATTTCG                                                                                                                                                                                                                                                                                                                                                                                                                                                                             |
| <i>COL2A1</i>                                                                                | GGGAGGGCGTGGGCTCTTCG                                                                                                                                                                                                                                                                                                                                                                                                                                                                             |
| <i>COL1A1</i>                                                                                | CGAGGTCACGGTCACGAAC                                                                                                                                                                                                                                                                                                                                                                                                                                                                              |
| <i>ACAN</i>                                                                                  | TCTTGGGCATTGTTGTTGAC                                                                                                                                                                                                                                                                                                                                                                                                                                                                             |
| <i>SOX9</i>                                                                                  | CCCGTCTTCACCGACTTCC                                                                                                                                                                                                                                                                                                                                                                                                                                                                              |
| <i>TIMP1</i>                                                                                 | GTTGTGGGACCTGTGGGAAGT                                                                                                                                                                                                                                                                                                                                                                                                                                                                            |
| <i>TIMP2</i>                                                                                 | GGGGGCGGTGTAGATAAACT                                                                                                                                                                                                                                                                                                                                                                                                                                                                             |
| <i>TIMP3</i>                                                                                 | ACCTCTCCACGAAGTTGCAC                                                                                                                                                                                                                                                                                                                                                                                                                                                                             |
| <i>SDHA</i>                                                                                  | CCACCACTGCATCAAAATTCATG                                                                                                                                                                                                                                                                                                                                                                                                                                                                          |
| <i>MMP1</i>                                                                                  | TCCTGCAGTTGAACCACTGA                                                                                                                                                                                                                                                                                                                                                                                                                                                                             |
| <i>MMP3</i>                                                                                  | AGCCTGGAGAATGTAGTGG                                                                                                                                                                                                                                                                                                                                                                                                                                                                              |
| <i>MMP13</i>                                                                                 | TGTAGGATGGTAGTATGAT                                                                                                                                                                                                                                                                                                                                                                                                                                                                              |
| <i>LGALS1</i>                                                                                | AGGTTGTTGCTGCTTTGC                                                                                                                                                                                                                                                                                                                                                                                                                                                                               |
| <i>LGALS3</i>                                                                                | GACTCTCTGTTGTTCTCATTG                                                                                                                                                                                                                                                                                                                                                                                                                                                                            |
| <i>LGALS8</i>                                                                                | GGATTGAAACTGAGGCACTGG                                                                                                                                                                                                                                                                                                                                                                                                                                                                            |
|                                                                                              |                                                                                                                                                                                                                                                                                                                                                                                                                                                                                                  |
| Probe sequence                                                                               | no probes used                                                                                                                                                                                                                                                                                                                                                                                                                                                                                   |
| In silico                                                                                    | All primers were subjected to BLAST analysis                                                                                                                                                                                                                                                                                                                                                                                                                                                     |
| empirical                                                                                    | Primers were used at 100 nM                                                                                                                                                                                                                                                                                                                                                                                                                                                                      |
| Priming conditions                                                                           | For cDNA synthesis, random RT primers were used as provided by the manufacturer (High Capacity cDNA Reverse Transcription Kit (Applied Biosystems, Austria)).                                                                                                                                                                                                                                                                                                                                    |
| PCR efficiency                                                                               | qPCR efficiencies were determined using dilution series of cDNA prepared from chondrocyte mRNA. Dilution efficiencies are given below in %.                                                                                                                                                                                                                                                                                                                                                      |
| <i>IL1B</i>                                                                                  | 95.1                                                                                                                                                                                                                                                                                                                                                                                                                                                                                             |
| <i>COL2A1</i>                                                                                | 92.4                                                                                                                                                                                                                                                                                                                                                                                                                                                                                             |
| <i>COL1A1</i>                                                                                | 89.2                                                                                                                                                                                                                                                                                                                                                                                                                                                                                             |
| <i>ACAN</i>                                                                                  | 98.6                                                                                                                                                                                                                                                                                                                                                                                                                                                                                             |
| <i>SOX9</i>                                                                                  | 100.0                                                                                                                                                                                                                                                                                                                                                                                                                                                                                            |
| <i>TIMP1</i>                                                                                 | 100.3                                                                                                                                                                                                                                                                                                                                                                                                                                                                                            |
| <i>TIMP2</i>                                                                                 | 101.9                                                                                                                                                                                                                                                                                                                                                                                                                                                                                            |
| <i>TIMP3</i>                                                                                 | 95.9                                                                                                                                                                                                                                                                                                                                                                                                                                                                                             |
| <i>SDHA</i>                                                                                  | 100.0                                                                                                                                                                                                                                                                                                                                                                                                                                                                                            |
| <i>MMP1</i>                                                                                  | 93.9                                                                                                                                                                                                                                                                                                                                                                                                                                                                                             |
| <i>MMP3</i>                                                                                  | 99.9                                                                                                                                                                                                                                                                                                                                                                                                                                                                                             |
| <i>MMP13</i>                                                                                 | 96.7                                                                                                                                                                                                                                                                                                                                                                                                                                                                                             |
| <i>LGALS1</i>                                                                                | 101.6                                                                                                                                                                                                                                                                                                                                                                                                                                                                                            |
| <i>LGALS3</i>                                                                                | 98.3                                                                                                                                                                                                                                                                                                                                                                                                                                                                                             |
| <i>LGALS8</i>                                                                                | 95.5                                                                                                                                                                                                                                                                                                                                                                                                                                                                                             |
|                                                                                              |                                                                                                                                                                                                                                                                                                                                                                                                                                                                                                  |
| Linear dynamic range                                                                         | The dynamic range of the primers was spanning unknown targets as determined by dilution curves.                                                                                                                                                                                                                                                                                                                                                                                                  |
| Limits of detection                                                                          | LODs were not determined in this study.                                                                                                                                                                                                                                                                                                                                                                                                                                                          |
| Intra-assay variation                                                                        | The intra-assay variation was below one Cq.                                                                                                                                                                                                                                                                                                                                                                                                                                                      |
| RT/PCR                                                                                       |                                                                                                                                                                                                                                                                                                                                                                                                                                                                                                  |
| Protocols                                                                                    | RT: equal RNA quantities were reverse transcribed into cDNA using the High Capacity cDNA Reverse Transcription Kit (Applied Biosystems, Austria; LOT#: 00810836).<br>qPCR: reactions were performed in 25 µl reaction mixtures containing 1 µl cDNA, 12.5 µl SensiMix SYBR Green Master Mix (Bioline, Austria; LOT#: 5M605-B060900), 100 nM primers (Metabion, Martinsried, Germany), and nuclease-free water to 25 µl, and run in duplicate on a QuantStudio3 QPCR system (Applied Biosystems). |
| Reagents                                                                                     | see above.                                                                                                                                                                                                                                                                                                                                                                                                                                                                                       |
| Duplicate RT                                                                                 | Replicates of the RT step were not performed in this study.                                                                                                                                                                                                                                                                                                                                                                                                                                      |
| NTC                                                                                          | NTCs were included in each run. The absence of both amplification and melting curve peaks were mandatory for the acceptance of the run.                                                                                                                                                                                                                                                                                                                                                          |
| NAC                                                                                          | Minus RT controls were prepared from randomly selected RNA samples.                                                                                                                                                                                                                                                                                                                                                                                                                              |
| Positive control                                                                             | Inter-run calibrators were not used.                                                                                                                                                                                                                                                                                                                                                                                                                                                             |
| Data analysis                                                                                |                                                                                                                                                                                                                                                                                                                                                                                                                                                                                                  |
| Specialist software                                                                          | Data were analyzed using the QuantStudio3 software (Applied Biosystems) considering both amplification efficiencies and normalization to SDHA as reference gene.                                                                                                                                                                                                                                                                                                                                 |
| Statistical justification                                                                    | For each experiment, chondrocytes were isolated from 3-6 donors and cultured and analyzed separately. All qPCR reactions were performed in duplicate. Data were exported to IBM SPSS v25 and analyzed using the integrated statistic tools. p-values < 0.05 were considered significant.                                                                                                                                                                                                         |
| Transparent, validated normalization                                                         | Among a selection of 6 candidate reference genes (please see doi:10.1186/1471-2199-8-13 for details on sequences and primer efficiencies), SDHA was selected as stable reference gene for experiments with primary chondrocytes under the experimental conditions of this study.                                                                                                                                                                                                                 |
