# Supplementary material for: The Dysregulated Galectin Network Activates NF-κB to Induce Disease Markers and Matrix Degeneration in 3D Pellet Cultures of Osteoarthritic Chondrocytes
Source: Springer Nature journal article supplement (doi:10.1007/s00223-020-00774-4), 2020-11-13
Supplement: MOESM4 [file 18584904]

# Supplemental file 4.

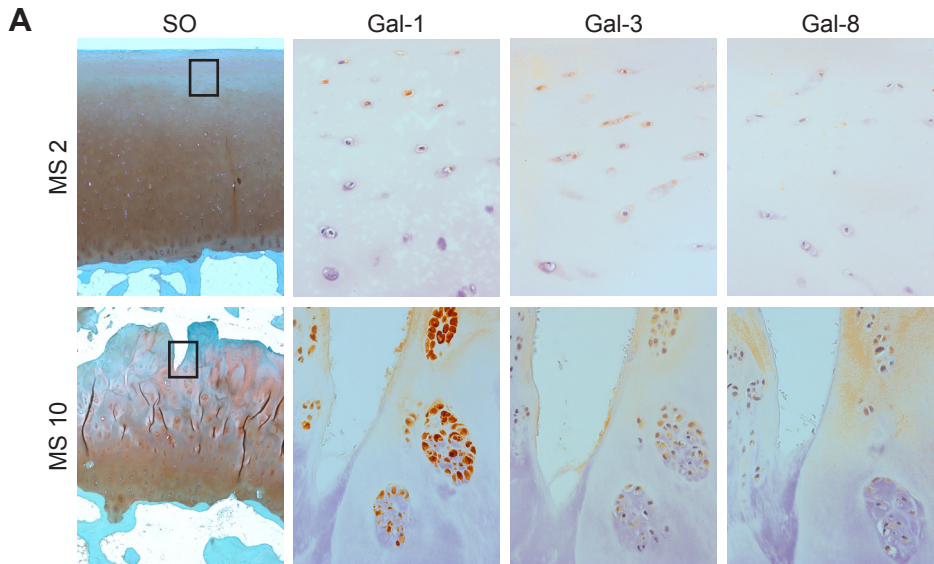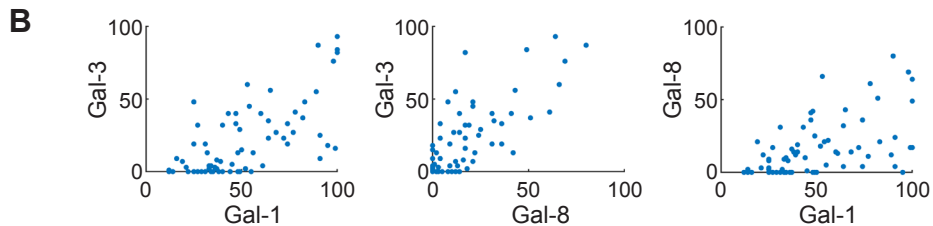

**C**

|                 | Spearman | p-value               |
|-----------------|----------|-----------------------|
| Gal-1 vs. Gal-3 | 0.66     | $6.7 \times 10^{-10}$ |
| Gal-1 vs. Gal-8 | 0.56     | $3.5 \times 10^{-7}$  |
| Gal-3 vs. Gal-8 | 0.72     | $3.4 \times 10^{-12}$ |
