# Supplementary material for: The Dysregulated Galectin Network Activates NF-κB to Induce Disease Markers and Matrix Degeneration in 3D Pellet Cultures of Osteoarthritic Chondrocytes
Source: Springer Nature journal article supplement (doi:10.1007/s00223-020-00774-4), 2020-11-13
Supplement: MOESM5 [file 18584904]

| GENE                                          | FUNCTION                                                                                                                               | ratio treated/<br>untreated | adj.<br>p-Val | ratio treated/<br>untreated | adj.<br>p-Val | ratio treated/<br>untreated | adj.<br>p-Val |
|-----------------------------------------------|----------------------------------------------------------------------------------------------------------------------------------------|-----------------------------|---------------|-----------------------------|---------------|-----------------------------|---------------|
| <b>Protein degradation</b>                    |                                                                                                                                        |                             |               |                             |               |                             |               |
| MMP10                                         | Degrades fibronectin, gelatins of type I, III, IV, and V                                                                               | 10.6                        | 5.E-04        | 8.0                         | 1.E-03        | 12.5                        | 3.E-06        |
| MMP12                                         | Hydrolysis of soluble and insoluble elastin.                                                                                           | 15.8                        | 7.E-05        | 8.3                         | 7.E-04        | 12.4                        | 3.E-07        |
| MMP13                                         | Degradation of fibrillar collagen, fibronectin, TNC and ACAN.                                                                          | 1.3                         | 3.E-02        | 4.7                         | 2.E-04        | 8.3                         | 2.E-04        |
| MMP1                                          | Cleaves collagens of types I, II, and III.                                                                                             | 1.5                         | 4.E-01        | 5.0                         | 3.E-03        | 7.5                         | 6.E-04        |
| MMP7                                          | Degrades casein, gelatins of types I, III, IV, and V, and fibronectin.                                                                 | 1.4                         | 5.E-02        | 2.6                         | 3.E-02        | 2.7                         | 7.E-03        |
| MMP16                                         | Cleaves fibronectin and also collagen type III.                                                                                        | 0.7                         | 2.E-03        | 0.7                         | 2.E-02        | 0.7                         | 7.E-04        |
| MMP9                                          | Cleaves type IV and type V collagen as well as fibronectin.                                                                            | 3.4                         | 2.E-03        | 1.4                         | 4.E-01        | 0.6                         | 3.E-04        |
| MMP19                                         | Degrades aggrecan and cartilage oligomeric matrix protein.                                                                             | 2.3                         | 2.E-04        | 1.3                         | 2.E-01        | 1.2                         | 3.E-01        |
| ADAMTS9                                       | Cleaves the large aggregating proteoglycans, aggrecan and versican.                                                                    | 2.6                         | 9.E-05        | 4.5                         | 3.E-03        | 4.6                         | 8.E-07        |
| ADAMTS4                                       | Cleaves aggrecan.                                                                                                                      | 6.4                         | 4.E-03        | 3.2                         | 4.E-02        | 2.4                         | 5.E-02        |
| ADAMTS12                                      | Cleaves alpha-2 macroglobulin and aggrecan.                                                                                            | 0.8                         | 4.E-02        | 0.9                         | 5.E-01        | 0.7                         | 2.E-02        |
| ADAMTS13                                      | Cleaves the von Willebrand factor.                                                                                                     | 0.6                         | 2.E-04        | 0.7                         | 7.E-03        | 0.7                         | 2.E-03        |
| ADAMTS1                                       | Cleaves aggrecan.                                                                                                                      | 0.1                         | 3.E-04        | 0.6                         | 4.E-01        | 0.5                         | 2.E-01        |
| <b>Core proteins</b>                          |                                                                                                                                        |                             |               |                             |               |                             |               |
| ASPN                                          | Asporin binds collagen, competing for the same binding sites as decorin.                                                               | 0.1                         | 8.E-06        | 0.1                         | 2.E-03        | 0.1                         | 5.E-06        |
| OGN                                           | Widely expressed in connective tissues, including cartilages, with unclear function.                                                   | 0.2                         | 6.E-06        | 0.5                         | 2.E-02        | 0.3                         | 2.E-03        |
| SDC1                                          | Cell surface proteoglycan that bears both heparan sulfate and chondroitin sulfate                                                      | 0.2                         | 2.E-06        | 0.3                         | 3.E-03        | 0.3                         | 2.E-04        |
| MATN2                                         | Involved in cartilage matrix assembly.                                                                                                 | 0.2                         | 2.E-04        | 0.5                         | 3.E-01        | 0.4                         | 9.E-02        |
| DCN                                           | May affect the rate of fibrils formation.                                                                                              | 0.2                         | 4.E-04        | 1.2                         | 6.E-01        | 0.5                         | 8.E-02        |
| HAPLN1                                        | Stabilizes the aggregates of proteoglycan monomers with hyaluronic acid in the extracellular cartilage matrix.                         | 0.2                         | 7.E-04        | 0.8                         | 6.E-01        | 0.5                         | 8.E-02        |
| GPC6                                          | Cell surface proteoglycan that bears heparan sulfate.                                                                                  | 0.3                         | 2.E-05        | 0.6                         | 4.E-02        | 0.5                         | 7.E-03        |
| MATN3                                         | Major component of the extracellular matrix of cartilage and may play a role in the formation of extracellular filamentous networks.   | 0.3                         | 1.E-02        | 0.6                         | 3.E-01        | 0.4                         | 4.E-02        |
| VCAN                                          | May play a role in intercellular signaling and in connecting cells with the extracellular matrix.                                      | 0.4                         | 3.E-02        | 0.5                         | 2.E-01        | 0.6                         | 2.E-01        |
| FMOD                                          | Affects the rate of fibrils formation. May have a primary role in collagen fibrillogenesis.                                            | 0.5                         | 3.E-04        | 0.8                         | 3.E-01        | 0.7                         | 7.E-02        |
| ACAN                                          | Major component of extracellular matrix of cartilaginous tissues                                                                       | 0.6                         | 5.E-02        | 0.5                         | 3.E-02        | 0.3                         | 8.E-05        |
| GPC3                                          | Cell surface proteoglycan that bears heparan sulfate.                                                                                  | 1.1                         | 3.E-01        | 1.1                         | 5.E-01        | 1.2                         | 8.E-02        |
| HAPLN3                                        | May function in hyaluronic acid binding.                                                                                               | 1.1                         | 3.E-01        | 1.7                         | 2.E-05        | 1.9                         | 1.E-05        |
| SDC4                                          | Cell surface proteoglycan that bears heparan sulfate                                                                                   | 3.9                         | 7.E-06        | 3.2                         | 6.E-04        | 3.3                         | 5.E-05        |
| <b>Glycosaminoglycan chain polymerisation</b> |                                                                                                                                        |                             |               |                             |               |                             |               |
| EXTL2                                         | Glycosyltransferase required for the biosynthesis of heparan-sulfate.                                                                  | 0.3                         | 2.E-05        | 0.7                         | 5.E-02        | 0.6                         | 2.E-03        |
| CHSY1                                         | Transfers GlcUA and GalNAc to the non-reducing end of the elongating chondroitin polymer.                                              | 0.5                         | 5.E-05        | 0.6                         | 2.E-02        | 0.8                         | 7.E-02        |
| CHSY3                                         | Transfers GlcUA and GalNAc to the non-reducing end of the elongating chondroitin polymer.                                              | 0.5                         | 2.E-03        | 0.9                         | 6.E-01        | 0.7                         | 6.E-02        |
| EXTL1                                         | Probable glycosyltransferase.                                                                                                          | 0.9                         | 3.E-01        | 0.7                         | 5.E-02        | 0.6                         | 6.E-03        |
| CSGALNACT1                                    | Required for elongation of chondroitin chains.                                                                                         | 1.8                         | 2.E-03        | 1.5                         | 4.E-02        | 1.4                         | 5.E-02        |
| HAS3                                          | Catalyzes the addition of GlcNAc or GlcUA monosaccharides to the nascent hyaluronan polymer.                                           | 2.8                         | 4.E-04        | 1.5                         | 2.E-01        | 1.3                         | 2.E-01        |
| HAS2                                          | Catalyzes the addition of GlcNAc or GlcUA monosaccharides to the nascent hyaluronan polymer.                                           | 3.4                         | 5.E-03        | 1.6                         | 2.E-01        | 1.8                         | 3.E-02        |
| HAS1                                          | Catalyzes the addition of GlcNAc or GlcUA monosaccharides to the nascent hyaluronan polymer.                                           | 3.8                         | 2.E-05        | 2.2                         | 1.E-01        | 2.1                         | 9.E-02        |
| <b>Glycosaminoglycan chain modification</b>   |                                                                                                                                        |                             |               |                             |               |                             |               |
| SUMF1                                         | Catalyzes the conversion of cysteine to 3-oxoalanine on target proteins.                                                               | 0.3                         | 6.E-05        | 0.5                         | 6.E-02        | 0.5                         | 1.E-02        |
| CHST14                                        | Catalyzes the transfer of sulfate to position 4 of the GalNAc residue of dermatan sulfate.                                             | 0.4                         | 2.E-04        | 0.7                         | 2.E-01        | 0.7                         | 1.E-01        |
| CHST6                                         | Catalyzes the transfer of sulfate to position 6 of non-reducing GlcNAc residues of keratan.                                            | 0.4                         | 1.E-04        | 0.6                         | 5.E-02        | 0.6                         | 1.E-02        |
| NDST1                                         | Catalyzes both the N-deacetylation and the N-sulfation of GlcNAc of the glycosaminoglycan in heparan sulfate.                          | 0.4                         | 2.E-04        | 0.7                         | 2.E-01        | 0.6                         | 7.E-02        |
| SUMF2                                         | Inhibits the activation of sulfatases by SUMF1.                                                                                        | 0.4                         | 2.E-04        | 0.7                         | 2.E-01        | 0.6                         | 6.E-02        |
| HS3ST1                                        | Catalyzes the transfer of a sulfo group to position 3 of glucosamine residues in heparan.                                              | 0.5                         | 2.E-02        | 0.4                         | 1.E-02        | 0.6                         | 7.E-02        |
| CHST1                                         | Catalyzes the transfer of sulfate to position 6 of Gal residues of keratan.                                                            | 0.6                         | 2.E-04        | 0.7                         | 9.E-03        | 0.6                         | 2.E-04        |
| HS6ST2                                        | Catalyzes the transfer of sulfate to position 6 of the GlcNs of heparan sulfate.                                                       | 0.7                         | 6.E-03        | 0.8                         | 2.E-01        | 0.9                         | 4.E-01        |
| CHST15                                        | Transfers sulfate to chondroitin sulfate A and forms chondroitin sulfate E containing GlcA-GalNAc(4,6-SO(4)) repeating units.          | 1.1                         | 8.E-01        | 1.8                         | 5.E-02        | 1.8                         | 2.E-02        |
| CHST9                                         | Catalyzes the transfer of sulfate to position 4 of non-reducing GalNAc residues. Isoform 2 is active towards chondroitin.              | 1.2                         | 2.E-02        | 1.0                         | 9.E-01        | 1.1                         | 2.E-01        |
| CHST7                                         | Catalyzes the transfer of sulfate to position 6 of GalNAc residue of chondroitin.                                                      | 2.2                         | 6.E-05        | 1.5                         | 6.E-02        | 1.8                         | 2.E-03        |
| HS3ST3B1                                      | Catalyzes the transfer of a sulfo group to an N-unsubstituted glucosamine linked to a 2-O-sulfo iduronic acid unit on heparan sulfate. | 3.4                         | 6.E-05        | 2.1                         | 2.E-02        | 3.3                         | 2.E-04        |
| CHST11                                        | Sulfotransferase that transfers sulfate to position 6 of Gal residues of keratan.                                                      | 5.7                         | 8.E-07        | 5.1                         | 4.E-05        | 4.6                         | 8.E-06        |
| CHST2                                         | Sulfates GlcNAc residues at terminal, non-reducing ends of oligosaccharide chains.                                                     | 7.6                         | 2.E-05        | 4.4                         | 3.E-03        | 7.0                         | 5.E-05        |
| <b>Glycosaminoglycan chain degradation</b>    |                                                                                                                                        |                             |               |                             |               |                             |               |
| HYAL1                                         | Hydrolysis of (1->4) linkages between N-acetyl-beta-D-glucosamine and D-glucuronate residues in hyaluronate.                           | 0.3                         | 1.E-04        | 0.6                         | 7.E-02        | 0.7                         | 5.E-02        |
| ARSK                                          | Arylsulfatase activity.                                                                                                                | 0.4                         | 1.E-05        | 0.6                         | 4.E-02        | 1.0                         | 8.E-01        |
| SGSH                                          | Catalyzes a step in lysosomal heparan sulfate degradation.                                                                             | 0.7                         | 2.E-03        | 0.7                         | 6.E-02        | 0.6                         | 2.E-03        |
| ARSJ                                          | Arylsulfatase activity.                                                                                                                | 1.8                         | 1.E-04        | 1.5                         | 1.E-02        | 1.4                         | 2.E-02        |
