# Supplementary material for: The Dysregulated Galectin Network Activates NF-κB to Induce Disease Markers and Matrix Degeneration in 3D Pellet Cultures of Osteoarthritic Chondrocytes
Source: Springer Nature journal article supplement (doi:10.1007/s00223-020-00774-4), 2020-11-13

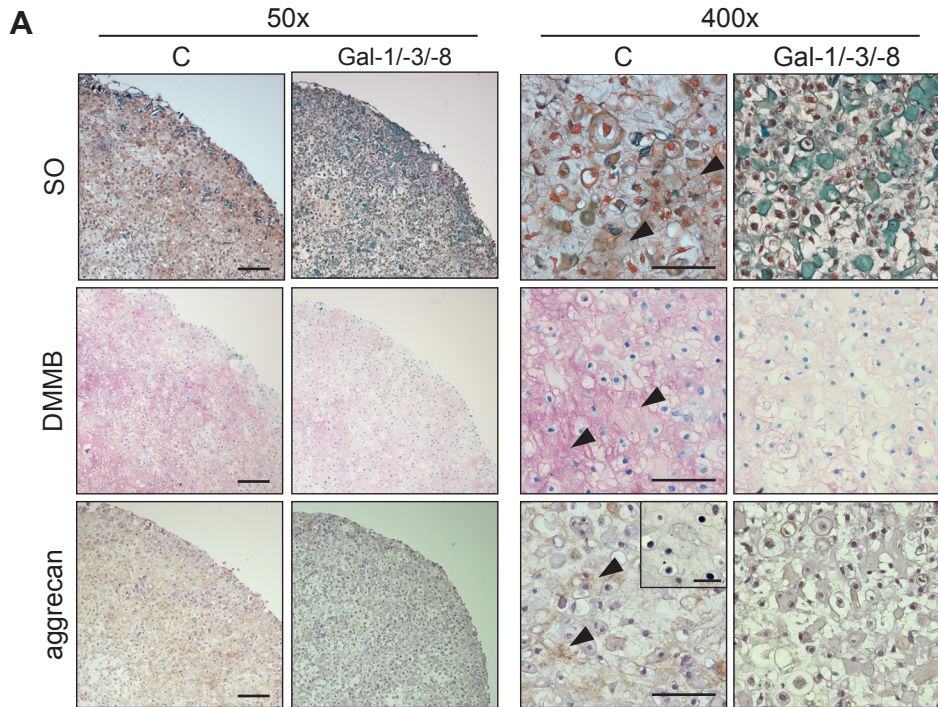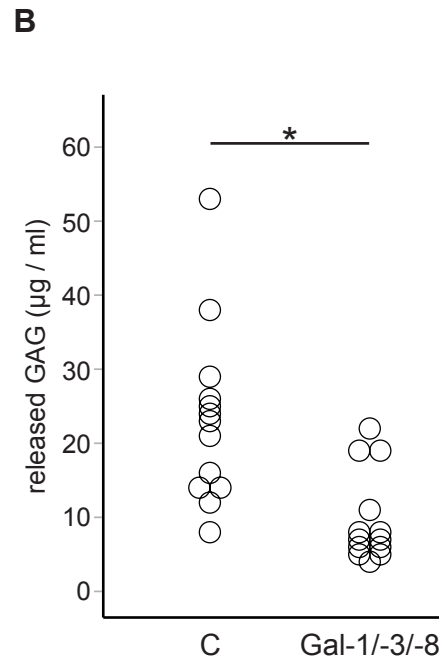

Supplement: MOESM6 [file 18584904]
